# Supplementary material
Source: Elsevier journal article supplement (https://www.sciencedirect.com/science/article/pii/S1885585723000257)
Supplement: mmc1 [file mmc1.pdf]

McInerney A, et al. *In-hospital outcomes following percutaneous versus surgical intervention in the treatment of aortic stenosis and concomitant coronary artery disease. Rev Esp Cardiol. 2022*

**SUPPLEMENTARY DATA**

**Table 1 of the supplementary data.** ICD 10 and CC codes used to identify eligible patients, their comorbidities and periprocedural complications

| Variable                                                                                                                                  | ICD-10 and CC codes                                                                                                                                                                                             |
|-------------------------------------------------------------------------------------------------------------------------------------------|-----------------------------------------------------------------------------------------------------------------------------------------------------------------------------------------------------------------|
| TAVR                                                                                                                                      | 02RF37Z, 02RF38Z, 02RF3JZ, 02RF3KZ, X2RF332, 02RF47Z, 02RF48Z, 02RF4JZ, 02RF4KZ, X2RF432,                                                                                                                       |
| SAVR with CABG                                                                                                                            | 02RF07Z, 02RF08Z, 02RF0KZ, X2RF032, 02RF0JZ                                                                                                                                                                     |
| Coronary angioplasty status                                                                                                               | Z98.61                                                                                                                                                                                                          |
| <i>Comorbidities</i>                                                                                                                      |                                                                                                                                                                                                                 |
| Hypertension                                                                                                                              | CC 95                                                                                                                                                                                                           |
| Diabetes                                                                                                                                  | CC 17-19, 123                                                                                                                                                                                                   |
| Protein calorie malnutrition                                                                                                              | CC 21                                                                                                                                                                                                           |
| Obesity                                                                                                                                   | CC 22, 26                                                                                                                                                                                                       |
| Liver disease                                                                                                                             | CC 27-32                                                                                                                                                                                                        |
| Prior atrial fibrillation                                                                                                                 | I48.0; I48.1; I48.2                                                                                                                                                                                             |
| Prior permanent pacemaker                                                                                                                 | Z95.0                                                                                                                                                                                                           |
| Prior stroke                                                                                                                              | CC 99-100                                                                                                                                                                                                       |
| Prior peripheral vascular disease                                                                                                         | CC 106-109                                                                                                                                                                                                      |
| Prior chronic obstructive pulmonary disease                                                                                               | CC 111                                                                                                                                                                                                          |
| Prior chronic renal failure                                                                                                               | CC 136-140                                                                                                                                                                                                      |
| Prior dialysis                                                                                                                            | CC 134                                                                                                                                                                                                          |
| Prior respiratory failure (on admission)                                                                                                  | CC 84                                                                                                                                                                                                           |
| <i>Complications*</i>                                                                                                                     |                                                                                                                                                                                                                 |
| Congestive heart failure                                                                                                                  | CC 85                                                                                                                                                                                                           |
| Atrial fibrillation                                                                                                                       | I48.0                                                                                                                                                                                                           |
| New stroke                                                                                                                                | I97.81x, I97.82x, G45.x                                                                                                                                                                                         |
| Vascular complications                                                                                                                    | T80.1XXA, T81.710A, T81.711A, T81.718A, T81.72XA, I77.0, I97.51                                                                                                                                                 |
| Acute renal failure                                                                                                                       | N170, N171, N172, N178, N179, 5A1D70Z, 5A1D80Z, 5A1D90Z                                                                                                                                                         |
| Respiratory complications (including pneumothorax, post procedure respiratory failure, hospital acquired pneumonia)                       | J95.811, J95.821, J95.851, J95.89, J95.859, J95.88, J95.89, CC 84, R09.01, R09.02                                                                                                                               |
| Pericardial complications (including pericarditis, hemopericardium, cardiac tamponade, need for pericardial window or pericardiocentesis) | I30.1, I30.0, I30.8, I30.9, I32.0, I31.0, I31.1, I31.3, I31.9, S26.0xxA, I31.2, I23.0, I23.3, I31.4, 0W9D00Z, 0W9D0ZZ, 0W9C00Z, 0W9C0ZZ, 0W9D30Z, 0W9D3ZZ, 0W9D40Z, 0W9D4ZZ, 0W9C30Z, 0W9C3ZZ, 0W9C40Z, 0W9C4ZZ |
| Myocardial injury                                                                                                                         | S26.1xxA, S26.9xxA, T81.535A                                                                                                                                                                                    |
| Postprocedural shock                                                                                                                      | T81.1xxA                                                                                                                                                                                                        |

McInerney A, et al. *In-hospital outcomes following percutaneous versus surgical intervention in the treatment of aortic stenosis and concomitant coronary artery disease. Rev Esp Cardiol. 2022*

|                                              |                                                                                                                                                                                                                                                                                                                                                                                                                                                                          |
|----------------------------------------------|--------------------------------------------------------------------------------------------------------------------------------------------------------------------------------------------------------------------------------------------------------------------------------------------------------------------------------------------------------------------------------------------------------------------------------------------------------------------------|
| New permanent pacemaker implantation         | OJH60PZ, OJH60PZ, OJH63PZ, OJH63PZ, OJH80PZ, OJH80PZ, OJH83PZ, OJH83PZ, OJPT0PZ, OJPT3PZ, OJH604Z, OJH634Z, OJH804Z, OJH834Z, OJH605Z, OJH635Z, OJH805Z, OJH835Z, OJH606Z, OJH636Z, OJH806Z, OJH836Z                                                                                                                                                                                                                                                                     |
| Acute liver failure                          | CC 30                                                                                                                                                                                                                                                                                                                                                                                                                                                                    |
| Blood transfusion                            | 302**H*, 302**N*                                                                                                                                                                                                                                                                                                                                                                                                                                                         |
| <i>Exclusions</i>                            |                                                                                                                                                                                                                                                                                                                                                                                                                                                                          |
| Infective endocarditis                       | I33.0, I33.9, I38, I39                                                                                                                                                                                                                                                                                                                                                                                                                                                   |
| Cardiogenic shock                            | R57.0                                                                                                                                                                                                                                                                                                                                                                                                                                                                    |
| Acute myocardial infarction                  | CC 86                                                                                                                                                                                                                                                                                                                                                                                                                                                                    |
| Concomitant mitral or tricuspid intervention | 024G07Z 024G08Z 024G0JZ 024G0KZ 02BG0ZX<br>02BG0ZZ 02CG0ZZ 02NG0ZZ 02QG0ZE 02QG0ZZ<br>02RG07Z 02RG08Z 02RG0JZ 02RG0KZ 02UG07E<br>02UG07Z 02UG08E 02UG08Z 02UG0JE 02UG0JZ<br>02UG0KE 02UG0KZ 02VG0ZZ 02WG07Z<br>02WG08Z 02WG0JZ 02WG0KZ<br>024J07Z 024J08Z 024J0JZ 024J0KZ 02BJ0ZX<br>02BJ0ZZ 02CJ0ZZ 02NJ0ZZ 02QJ0ZG 02QJ0ZZ<br>02RJ07Z 02RJ08Z 02RJ0JZ 02RJ0KZ 02UJ07G<br>02UJ07Z 02UJ08G 02UJ08Z 02UJ0JG 02UJ0JZ<br>02UJ0KG 02UJ0KZ 02WJ07Z 02WJ08Z 02WJ0JZ<br>02WJ0KZ |

\*Not present on admission.
